# Supplementary material
Source: PubMed Central journal article supplement (PMC2723668)
Supplement: 10096_2009_725_MOESM1_ESM.pdf [file 10096_2009_725_MOESM1_ESM.pdf]

**Table 2: Comparative susceptibilities of Gram-positive pathogens to tigecycline and other antibacterial agents in 2005 (G-TEST I) and in 2007 (G-TEST II)**

| Organism                                  | No. of isolates tested |           | Antibacterial agent         | MIC ( $\mu\text{g/mL}$ ) |              |              |              | % susceptible |           | % resistant |           |     |      |      |      |      |
|-------------------------------------------|------------------------|-----------|-----------------------------|--------------------------|--------------|--------------|--------------|---------------|-----------|-------------|-----------|-----|------|------|------|------|
|                                           | G-TEST I               | G-TEST II |                             | 50%                      |              | 90%          |              | G-TEST I      | G-TEST II | G-TEST I    | G-TEST II |     |      |      |      |      |
|                                           |                        |           |                             | G-TEST I                 | G-TEST II    | G-TEST I     | G-TEST II    |               |           |             |           |     |      |      |      |      |
| <i>E. faecalis</i>                        | 150                    | 149       | Tigecycline                 | $\leq 0.125$             | $\leq 0.125$ | $\leq 0.125$ | $\leq 0.125$ | 100           | 100       | 0           | 0         |     |      |      |      |      |
|                                           |                        |           | Doxycycline                 | 8                        | 8            | 16           | 16           | 23.3          | 19.5      | 70.7        | 59.7      |     |      |      |      |      |
|                                           |                        |           | Amoxicillin-clavulanic acid | 0.5                      | 0.5          | 1            | 1            | 100           | 99.3      | 0           | 0.7       |     |      |      |      |      |
|                                           |                        |           | Piperacillin-tazobactam     | 2                        | 2            | 8            | 8            | n.d.          | n.d.      | n.d.        | n.d.      |     |      |      |      |      |
|                                           |                        |           | Imipenem                    | 1                        | 1            | 2            | 2            | 99.3          | 99.3      | 0           | 0.7       |     |      |      |      |      |
|                                           |                        |           | Moxifloxacin                | 0.5                      | 0.5          | $\geq 16$    | $\geq 16$    | n.d.          | n.d.      | n.d.        | n.d.      |     |      |      |      |      |
|                                           |                        |           | Linezolid                   | 2                        | 2            | 2            | 2            | 100           | 100       | 0           | 0         |     |      |      |      |      |
|                                           |                        |           | Vancomycin                  | 1                        | 1            | 2            | 2            | 100           | 100       | 0           | 0         |     |      |      |      |      |
| Gentamicin (high level) <sup>a</sup>      |                        |           |                             |                          |              |              |              |               | 38.0      | 38.9        |           |     |      |      |      |      |
| <i>E. faecium</i>                         | 145                    | 142       | Tigecycline                 | $\leq 0.125$             | $\leq 0.125$ | $\leq 0.125$ | $\leq 0.125$ | 100           | 100       | 0           | 0         |     |      |      |      |      |
|                                           |                        |           | Doxycycline                 | $\leq 0.25$              | $\leq 0.25$  | 8            | 4            | 69.0          | 78.2      | 11.7        | 6.3       |     |      |      |      |      |
|                                           |                        |           | Amoxicillin-clavulanic acid | $\geq 32$                | $\geq 32$    | $\geq 32$    | $\geq 32$    | 4.8           | 7.0       | 91.7        | 93.0      |     |      |      |      |      |
|                                           |                        |           | Piperacillin-tazobactam     | $\geq 128$               | $\geq 128$   | $\geq 128$   | $\geq 128$   | n.d.          | n.d.      | n.d.        | n.d.      |     |      |      |      |      |
|                                           |                        |           | Imipenem                    | $\geq 64$                | $\geq 64$    | $\geq 64$    | $\geq 64$    | 4.8           | 6.3       | 95.2        | 93.0      |     |      |      |      |      |
|                                           |                        |           | Moxifloxacin                | $\geq 16$                | $\geq 16$    | $\geq 16$    | $\geq 16$    | n.d.          | n.d.      | n.d.        | n.d.      |     |      |      |      |      |
|                                           |                        |           | Linezolid                   | 2                        | 1            | 2            | 2            | 99.3          | 100       | 0.7         | 0         |     |      |      |      |      |
|                                           |                        |           | Vancomycin                  | 0.5                      | 1            | 8            | $\geq 32$    | 89.0          | 81.7      | 9.7         | 18.3      |     |      |      |      |      |
| Gentamicin (high level) <sup>a</sup>      |                        |           |                             |                          |              |              |              |               | 43.4      | 37.3        |           |     |      |      |      |      |
| Oxacillin-susceptible<br><i>S. aureus</i> | 148                    | 153       | Tigecycline                 | $\leq 0.125$             | $\leq 0.125$ | $\leq 0.125$ | 0.25         | 100           | 100       | 0           | 0         |     |      |      |      |      |
|                                           |                        |           | Doxycycline                 | $\leq 0.25$              | $\leq 0.25$  | $\leq 0.25$  | $\leq 0.25$  | 96.6          | 94.1      | 3.4         | 2.6       |     |      |      |      |      |
|                                           |                        |           | Penicillin G                | 2                        | 1            | $\geq 8$     | $\geq 8$     | 20.9          | 28.8      | 79.1        | 71.2      |     |      |      |      |      |
|                                           |                        |           | Amoxicillin-clavulanic acid | 0.5                      | 1            | 1            | 1            | n.d.          | n.d.      | n.d.        | n.d.      |     |      |      |      |      |
|                                           |                        |           | Piperacillin-tazobactam     | $\leq 0.5$               | $\leq 0.5$   | 1            | 1            | n.d.          | n.d.      | n.d.        | n.d.      |     |      |      |      |      |
|                                           |                        |           | Cefuroxime                  | 2                        | 1            | 2            | 2            | n.d.          | n.d.      | n.d.        | n.d.      |     |      |      |      |      |
|                                           |                        |           | Imipenem                    | $\leq 0.25$              | $\leq 0.25$  | $\leq 0.25$  | 0.5          | n.d.          | n.d.      | n.d.        | n.d.      |     |      |      |      |      |
|                                           |                        |           | Moxifloxacin                | $\leq 0.063$             | $\leq 0.063$ | 4            | 4            | 82.4          | 86.9      | 13.5        | 11.8      |     |      |      |      |      |
|                                           |                        |           | Linezolid                   | 2                        | 2            | 4            | 4            | 100           | 100       | 0           | 0         |     |      |      |      |      |
|                                           |                        |           | Vancomycin                  | 1                        | 0.5          | 1            | 1            | 100           | 100       | 0           | 0         |     |      |      |      |      |
| Gentamicin                                |                        |           |                             |                          |              |              |              |               | 92.6      | 92.2        | 7.4       | 7.8 |      |      |      |      |
| Oxacillin-resistant<br><i>S. aureus</i>   | 154                    | 155       | Tigecycline                 | $\leq 0.125$             | 0.25         | 0.25         | 0.25         | 100           | 100       | 0           | 0         |     |      |      |      |      |
|                                           |                        |           | Doxycycline                 | $\leq 0.25$              | $\leq 0.25$  | 0.5          | $\leq 0.25$  | 93.5          | 96.1      | 5.8         | 3.9       |     |      |      |      |      |
|                                           |                        |           | Penicillin G                | $\geq 8$                 | $\geq 8$     | $\geq 8$     | $\geq 8$     | n.d.          | n.d.      | n.d.        | n.d.      |     |      |      |      |      |
|                                           |                        |           | Amoxicillin-clavulanic acid | 16                       | $\geq 32$    | $\geq 32$    | $\geq 32$    | n.d.          | n.d.      | n.d.        | n.d.      |     |      |      |      |      |
|                                           |                        |           | Piperacillin-tazobactam     | 64                       | 64           | $\geq 128$   | $\geq 128$   | n.d.          | n.d.      | n.d.        | n.d.      |     |      |      |      |      |
|                                           |                        |           | Cefuroxime                  | $\geq 64$                | $\geq 64$    | $\geq 64$    | $\geq 64$    | n.d.          | n.d.      | n.d.        | n.d.      |     |      |      |      |      |
|                                           |                        |           | Imipenem                    | 4                        | 4            | $\geq 64$    | 32           | n.d.          | n.d.      | n.d.        | n.d.      |     |      |      |      |      |
|                                           |                        |           | Moxifloxacin                | 4                        | 4            | 8            | 8            | 1.3           | 1.9       | 90.9        | 94.8      |     |      |      |      |      |
|                                           |                        |           | Linezolid                   | 2                        | 2            | 4            | 4            | 100           | 100       | 0           | 0         |     |      |      |      |      |
|                                           |                        |           | Vancomycin                  | 1                        | 1            | 1            | 1            | 100           | 100       | 0           | 0         |     |      |      |      |      |
| Gentamicin                                |                        |           |                             |                          |              |              |              |               | 1         | 0.5         | $\geq 32$ | 16  | 77.3 | 87.1 | 22.7 | 12.9 |

Table 2 (continued)

| Organism                    | No. of isolates tested |           | Antibacterial agent         | MIC (µg/mL) |           |             |           | % susceptible |           | % resistant |           |
|-----------------------------|------------------------|-----------|-----------------------------|-------------|-----------|-------------|-----------|---------------|-----------|-------------|-----------|
|                             |                        |           |                             | 50%         |           | 90%         |           | G-TEST I      | G-TEST II | G-TEST I    | G-TEST II |
|                             | G-TEST I               | G-TEST II |                             | G-TEST I    | G-TEST II | G-TEST I    | G-TEST II |               |           |             |           |
| <i>S. epidermidis</i>       | 168                    | 142       | Oxacillin                   | ≥16         | ≥16       | ≥16         | ≥16       | 17.3          | 16.9      | 82.7        | 83.1      |
|                             |                        |           | Tigecycline                 | 0.25        | 0.25      | 0.5         | 0.5       | 100           | 100       | 0           | 0         |
|                             |                        |           | Doxycycline                 | 0.5         | 0.5       | 4           | 2         | 86.9          | 85.9      | 10.1        | 9.2       |
|                             |                        |           | Penicillin G                | ≥8          | 4         | ≥8          | ≥8        | 8.9           | 12.0      | 91.1        | 88.0      |
|                             |                        |           | Amoxicillin-clavulanic acid | 2           | 2         | 8           | 8         | n.d.          | n.d.      | n.d.        | n.d.      |
|                             |                        |           | Piperacillin-tazobactam     | 2           | 2         | 16          | 16        | n.d.          | n.d.      | n.d.        | n.d.      |
|                             |                        |           | Cefuroxime                  | 8           | 8         | ≥64         | ≥64       | n.d.          | n.d.      | n.d.        | n.d.      |
|                             |                        |           | Imipenem                    | 1           | 2         | 16          | 16        | n.d.          | n.d.      | n.d.        | n.d.      |
|                             |                        |           | Moxifloxacin                | 1           | 2         | 2           | 4         | 33.9          | 33.1      | 42.3        | 52.1      |
|                             |                        |           | Linezolid                   | 1           | 1         | 2           | 2         | 100           | 100       | 0           | 0         |
|                             |                        |           | Vancomycin                  | 2           | 1         | 2           | 2         | 100           | 100       | 0           | 0         |
|                             |                        |           | Gentamicin                  | 16          | 8         | ≥32         | ≥32       | 34.5          | 43.7      | 65.5        | 56.3      |
| <i>S. haemolyticus</i>      | 73                     | 66        | Oxacillin                   | ≥16         | ≥16       | ≥16         | ≥16       | 9.6           | 9.1       | 90.4        | 90.9      |
|                             |                        |           | Tigecycline                 | 0.25        | 0.25      | 0.5         | 0.5       | 98.6          | 95.1      | 1.4         | 4.5       |
|                             |                        |           | Doxycycline                 | 0.5         | 0.5       | 4           | 8         | 84.9          | 86.4      | 5.5         | 12.1      |
|                             |                        |           | Penicillin G                | ≥8          | ≥8        | ≥8          | ≥8        | 4.1           | 6.1       | 95.9        | 93.9      |
|                             |                        |           | Amoxicillin-clavulanic acid | 16          | 16        | ≥32         | ≥32       | n.d.          | n.d.      | n.d.        | n.d.      |
|                             |                        |           | Piperacillin-tazobactam     | 64          | 16        | ≥128        | ≥128      | n.d.          | n.d.      | n.d.        | n.d.      |
|                             |                        |           | Cefuroxime                  | ≥64         | ≥64       | ≥64         | ≥64       | n.d.          | n.d.      | n.d.        | n.d.      |
|                             |                        |           | Imipenem                    | 32          | 8         | ≥64         | ≥64       | n.d.          | n.d.      | n.d.        | n.d.      |
|                             |                        |           | Moxifloxacin                | 2           | 2         | 4           | 4         | 19.2          | 22.7      | 57.5        | 51.5      |
|                             |                        |           | Linezolid                   | 1           | 1         | 2           | 1         | 100           | 100       | 0           | 0         |
|                             |                        |           | Vancomycin                  | 1           | 1         | 2           | 1         | 100           | 100       | 0           | 0         |
|                             |                        |           | Gentamicin                  | ≥32         | 16        | ≥32         | ≥32       | 19.2          | 15.2      | 80.8        | 84.8      |
| <i>S. agalactiae</i>        | 92                     | 76        | Tigecycline                 | ≤0.125      | ≤0.125    | ≤0.125      | ≤0.125    | 100           | 100       | 0           | 0         |
|                             |                        |           | Doxycycline                 | 8           | 8         | 16          | 16        | 25.0          | 22.4      | 70.7        | 77.6      |
|                             |                        |           | Penicillin G                | 0.063       | 0.063     | 0.125       | 0.125     | 100           | 100       | 0           | 0         |
|                             |                        |           | Amoxicillin-clavulanic acid | ≤0.125      | ≤0.125    | ≤0.125      | ≤0.125    | n.d.          | n.d.      | n.d.        | n.d.      |
|                             |                        |           | Piperacillin-tazobactam     | ≤0.5        | ≤0.5      | ≤0.5        | ≤0.5      | n.d.          | n.d.      | n.d.        | n.d.      |
|                             |                        |           | Cefuroxime                  | ≤0.25       | ≤0.25     | ≤0.25       | ≤0.25     | 100           | 100       | 0           | 0         |
|                             |                        |           | Imipenem                    | ≤0.25       | ≤0.25     | ≤0.25       | ≤0.25     | 100           | 100       | 0           | 0         |
|                             |                        |           | Moxifloxacin                | 0.125       | 0.125     | 0.25        | 0.25      | 100           | 100       | 0           | 0         |
|                             |                        |           | Linezolid                   | 1           | 1         | 2           | 2         | 100           | 100       | 0           | 0         |
|                             |                        |           | Vancomycin                  | 0.5         | 0.5       | 0.5         | 0.5       | 100           | 100       | 0           | 0         |
|                             |                        |           | Gentamicin                  | 8           | 16        | 16          | 16        | n.d.          | n.d.      | n.d.        | n.d.      |
|                             |                        |           | <i>S. pneumoniae</i>        | 58          | 70        | Tigecycline | ≤0.125    | ≤0.125        | ≤0.125    | ≤0.125      | n.d.      |
| Doxycycline                 | ≤0.25                  | ≤0.25     |                             |             |           | 0.5         | 4         | 91.4          | 88.6      | 5.2         | 11.4      |
| Penicillin G                | ≤0.031                 | ≤0.031    |                             |             |           | 0.125       | 0.25      | 87.9          | 85.7      | 0           | 0         |
| Amoxicillin-clavulanic acid | ≤0.125                 | ≤0.125    |                             |             |           | ≤0.125      | 0.25      | n.d.          | n.d.      | n.d.        | n.d.      |
| Piperacillin-tazobactam     | ≤0.5                   | ≤0.5      |                             |             |           | ≤0.5        | ≤0.5      | n.d.          | n.d.      | n.d.        | n.d.      |
| Cefuroxime                  | ≤0.25                  | ≤0.25     |                             |             |           | ≤0.25       | 0.5       | 96.6          | 91.4      | 3.4         | 7.1       |
| Imipenem                    | ≤0.25                  | ≤0.25     |                             |             |           | ≤0.25       | 0.5       | 100           | 100       | 0           | 0         |
| Moxifloxacin                | 0.125                  | 0.125     |                             |             |           | 0.25        | 0.25      | 100           | 100       | 0           | 0         |
| Linezolid                   | 1                      | 1         |                             |             |           | 1           | 1         | 100           | 100       | 0           | 0         |
| Vancomycin                  | 0.25                   | 0.25      |                             |             |           | 0.5         | 0.25      | 100           | 100       | 0           | 0         |
| Gentamicin                  | 4                      | 4         |                             |             |           | 4           | 8         | n.d.          | n.d.      | n.d.        | n.d.      |
| <i>S. pyogenes</i>          | 54                     | 63        |                             |             |           | Tigecycline | ≤0.125    | ≤0.125        | ≤0.125    | ≤0.125      | 100       |
|                             |                        |           | Doxycycline                 | ≤0.25       | ≤0.25     | 8           | 8         | 85.2          | 82.5      | 13.0        | 17.5      |
|                             |                        |           | Penicillin G                | ≤0.031      | ≤0.031    | ≤0.031      | ≤0.031    | 100           | 100       | 0           | 0         |
|                             |                        |           | Amoxicillin-clavulanic acid | ≤0.125      | ≤0.125    | ≤0.125      | ≤0.125    | n.d.          | n.d.      | n.d.        | n.d.      |
|                             |                        |           | Piperacillin-tazobactam     | ≤0.5        | ≤0.5      | ≤0.5        | ≤0.5      | n.d.          | n.d.      | n.d.        | n.d.      |
|                             |                        |           | Cefuroxime                  | ≤0.25       | ≤0.25     | ≤0.25       | ≤0.25     | 100           | 100       | 0           | 0         |
|                             |                        |           | Imipenem                    | ≤0.25       | ≤0.25     | ≤0.25       | ≤0.25     | 100           | 100       | 0           | 0         |
|                             |                        |           | Moxifloxacin                | 0.125       | 0.125     | 0.25        | 0.25      | 100           | 100       | 0           | 0         |
|                             |                        |           | Linezolid                   | 1           | 1         | 1           | 1         | 100           | 100       | 0           | 0         |
|                             |                        |           | Vancomycin                  | 0.5         | 0.5       | 0.5         | 0.5       | 100           | 100       | 0           | 0         |
|                             |                        |           | Gentamicin                  | 4           | 4         | 4           | 4         | n.d.          | n.d.      | n.d.        | n.d.      |

n.d.=not determined as no species-related breakpoint has been approved by the EUCAST

<sup>†</sup>MIC >500 mg/l

**Table 3: Comparative susceptibilities of Gram-negative pathogens to tigecycline and other antibacterial agents in 2005 (G-TEST I) and in 2007 (G-TEST II)**

| Organism                    | No. of isolates tested |              | Antibacterial agent         | MIC ( $\mu\text{g/mL}$ ) |              |              |              | % susceptible |              | % resistant  |              |
|-----------------------------|------------------------|--------------|-----------------------------|--------------------------|--------------|--------------|--------------|---------------|--------------|--------------|--------------|
|                             | G-TEST I               | G-TEST II    |                             | 50%                      |              | 90%          |              | G-TEST I      | G-TEST II    | G-TEST I     | G-TEST II    |
|                             |                        |              |                             | G-TEST I                 | G-TEST II    | G-TEST I     | G-TEST II    |               |              |              |              |
| <i>A. baumannii</i> group   | 140                    | 117          | Tigecycline                 | 0.25                     | 0.25         | 0.5          | 1            | n.d.          | n.d.         | n.d.         | n.d.         |
|                             |                        |              | Doxycycline                 | $\leq 0.25$              | $\leq 0.25$  | 1            | 4            | n.d.          | n.d.         | n.d.         | n.d.         |
|                             |                        |              | Amoxicillin-clavulanic acid | 16                       | 16           | 32           | $\geq 128$   | n.d.          | n.d.         | n.d.         | n.d.         |
|                             |                        |              | Piperacillin-tazobactam     | 2                        | 2            | 32           | $\geq 128$   | n.d.          | n.d.         | n.d.         | n.d.         |
|                             |                        |              | Cefotaxime                  | 8                        | 16           | $\geq 64$    | $\geq 64$    | n.d.          | n.d.         | n.d.         | n.d.         |
|                             |                        |              | Ceftazidime                 | 4                        | 4            | 32           | $\geq 64$    | n.d.          | n.d.         | n.d.         | n.d.         |
|                             |                        |              | Cefepime                    | 4                        | 4            | 16           | $\geq 64$    | n.d.          | n.d.         | n.d.         | n.d.         |
|                             |                        |              | Imipenem                    | $\leq 0.25$              | 0.5          | 0.5          | 16           | 97.9          | 84.6         | 0.7          | 11.1         |
|                             |                        |              | Ertapenem                   | 4                        | 4            | 8            | $\geq 64$    | n.d.          | n.d.         | n.d.         | n.d.         |
|                             |                        |              | Ciprofloxacin               | 0.25                     | 0.25         | $\geq 16$    | $\geq 16$    | 70.0          | 72.6         | 30.0         | 27.4         |
|                             |                        |              | Moxifloxacin                | $\leq 0.063$             | $\leq 0.063$ | 4            | $\geq 16$    | n.d.          | n.d.         | n.d.         | n.d.         |
| Gentamicin                  | 1                      | 1            | 16                          | $\geq 32$                | 86.4         | 77.8         | 13.6         | 22.2          |              |              |              |
| <i>E. cloacae</i>           | 232                    | 223          | Tigecycline                 | 0.5                      | 0.5          | 2            | 1            | 89.7          | 90.1         | 6.9          | 6.3          |
|                             |                        |              | Doxycycline                 | 2                        | 2            | 8            | 8            | 30.2          | 26.0         | 10.8         | 10.8         |
|                             |                        |              | Amoxicillin-clavulanic acid | $\geq 64$                | $\geq 64$    | $\geq 64$    | $\geq 64$    | 0             | 3.1          | 98.7         | 96.4         |
|                             |                        |              | Piperacillin-tazobactam     | 2                        | 2            | 32           | 64           | 72.8          | 72.6         | 18.5         | 22.0         |
|                             |                        |              | Cefotaxime                  | 1                        | 0.5          | $\geq 64$    | $\geq 64$    | 57.8          | 56.5         | 40.5         | 42.6         |
|                             |                        |              | Ceftazidime                 | 0.5                      | 0.5          | $\geq 64$    | $\geq 64$    | 57.3          | 59.2         | 29.3         | 34.1         |
|                             |                        |              | Cefepime                    | $\leq 0.25$              | $\leq 0.25$  | 4            | 4            | 78.4          | 78.9         | 3.4          | 2.2          |
|                             |                        |              | Imipenem                    | 0.5                      | 0.5          | 1            | 1            | 100           | 100          | 0            | 0            |
|                             |                        |              | Ertapenem                   | $\leq 0.25$              | $\leq 0.25$  | 1            | 1            | 88.4          | 83.9         | 3.9          | 8.5          |
|                             |                        |              | Ciprofloxacin               | $\leq 0.063$             | $\leq 0.063$ | 0.25         | 0.5          | 92.7          | 91.5         | 5.6          | 7.2          |
|                             |                        |              | Moxifloxacin                | $\leq 0.063$             | $\leq 0.063$ | 0.5          | 1            | 91.4          | 88.3         | 6.0          | 9.4          |
|                             |                        |              | Gentamicin                  | 0.5                      | 0.5          | 1            | 2            | 94.0          | 90.6         | 4.7          | 6.3          |
|                             |                        |              | <i>E. coli</i>              | 300                      | 292          | Tigecycline  | $\leq 0.125$ | $\leq 0.125$  | 0.25         | 0.25         | 100          |
| Doxycycline                 | 2                      | 1            |                             |                          |              | 32           | $\geq 64$    | 46.3          | 50.0         | 44.0         | 40.4         |
| Amoxicillin-clavulanic acid | 8                      | 8            |                             |                          |              | 16           | 16           | 18.3          | 16.1         | 24.3         | 28.8         |
| Piperacillin-tazobactam     | 1                      | 1            |                             |                          |              | 4            | 8            | 94.7          | 91.8         | 3.7          | 6.2          |
| Cefotaxime                  | $\leq 0.25$            | $\leq 0.25$  |                             |                          |              | $\leq 0.25$  | $\geq 64$    | 94.3          | 87.7         | 5.3          | 12.3         |
| Ceftazidime                 | $\leq 0.25$            | $\leq 0.25$  |                             |                          |              | 0.5          | 2            | 94.0          | 88.0         | 2.0          | 5.8          |
| Cefepime                    | $\leq 0.25$            | $\leq 0.25$  |                             |                          |              | 0.5          | 8            | 94.0          | 88.0         | 3.0          | 9.9          |
| Imipenem                    | $\leq 0.25$            | 0.5          |                             |                          |              | 0.5          | 1            | 100           | 100          | 0            | 0            |
| Ertapenem                   | $\leq 0.25$            | $\leq 0.25$  |                             |                          |              | $\leq 0.25$  | $\leq 0.25$  | 100           | 100          | 0            | 0            |
| Ciprofloxacin               | $\leq 0.063$           | $\leq 0.063$ |                             |                          |              | $\geq 16$    | $\geq 16$    | 78.0          | 71.2         | 21.7         | 28.4         |
| Moxifloxacin                | $\leq 0.063$           | $\leq 0.063$ |                             |                          |              | $\geq 16$    | $\geq 16$    | 77.3          | 70.2         | 21.7         | 28.8         |
| Gentamicin                  | 0.5                    | 1            |                             |                          |              | 2            | 8            | 91.3          | 88.7         | 7.7          | 10.3         |
| <i>H. influenzae</i>        | 185                    | 225          |                             |                          |              | Tigecycline  | 0.25         | $\leq 0.125$  | 0.25         | 0.5          | n.d.         |
|                             |                        |              | Doxycycline                 | $\leq 0.25$              | $\leq 0.25$  | 0.5          | 0.5          | 98.9          | 98.7         | 0            | 0.9          |
|                             |                        |              | Amoxicillin-clavulanic acid | $\leq 0.25$              | $\leq 0.25$  | 1            | 1            | 96.8          | 94.7         | 3.2          | 5.3          |
|                             |                        |              | Piperacillin-tazobactam     | $\leq 0.5$               | $\leq 0.5$   | $\leq 0.5$   | $\leq 0.5$   | n.d.          | n.d.         | n.d.         | n.d.         |
|                             |                        |              | Cefotaxime                  | $\leq 0.25$              | $\leq 0.25$  | $\leq 0.25$  | $\leq 0.25$  | <sup>a</sup>  | <sup>a</sup> | <sup>a</sup> | <sup>a</sup> |
|                             |                        |              | Ceftazidime                 | $\leq 0.25$              | $\leq 0.25$  | $\leq 0.25$  | $\leq 0.25$  | n.d.          | n.d.         | n.d.         | n.d.         |
|                             |                        |              | Cefepime                    | $\leq 0.25$              | $\leq 0.25$  | $\leq 0.25$  | $\leq 0.25$  | 99.5          | 99.1         | 0.5          | 0.9          |
|                             |                        |              | Imipenem                    | 0.5                      | 0.5          | 1            | 1            | 100           | 98.2         | 0            | 1.8          |
|                             |                        |              | Ertapenem                   | $\leq 0.25$              | $\leq 0.25$  | $\leq 0.25$  | $\leq 0.25$  | 100           | 100          | 0            | 0            |
|                             |                        |              | Ciprofloxacin               | $\leq 0.063$             | $\leq 0.063$ | $\leq 0.063$ | $\leq 0.063$ | 100           | 100          | 0            | 0            |
|                             |                        |              | Moxifloxacin                | $\leq 0.063$             | $\leq 0.063$ | $\leq 0.063$ | $\leq 0.063$ | 100           | 100          | 0            | 0            |
|                             |                        |              | Gentamicin                  | 2                        | 2            | 2            | 2            | n.d.          | n.d.         | n.d.         | n.d.         |

Table 3 (continued)

| Organism                    | No. of isolates tested |           | Antibacterial agent         | MIC (µg/mL) |           |             |           | % susceptible |           | % resistant |           |
|-----------------------------|------------------------|-----------|-----------------------------|-------------|-----------|-------------|-----------|---------------|-----------|-------------|-----------|
|                             | G-TEST I               | G-TEST II |                             | 50%         |           | 90%         |           | G-TEST I      | G-TEST II | G-TEST I    | G-TEST II |
|                             |                        |           |                             | G-TEST I    | G-TEST II | G-TEST I    | G-TEST II |               |           |             |           |
| <i>K. oxytoca</i>           | 100                    | 109       | Tigecycline                 | 0.25        | 0.25      | 0.5         | 1         | 97.0          | 93.6      | 2.0         | 1.8       |
|                             |                        |           | Doxycycline                 | 0.5         | 1         | 4           | 8         | 84.0          | 66.1      | 4.0         | 16.5      |
|                             |                        |           | Amoxicillin-clavulanic acid | 2           | 4         | 16          | 32        | 69.0          | 39.4      | 15.0        | 25.7      |
|                             |                        |           | Piperacillin-tazobactam     | 1           | 2         | ≥128        | ≥128      | 85.0          | 74.3      | 14.0        | 23.9      |
|                             |                        |           | Cefotaxime                  | ≤0.25       | ≤0.25     | 1           | 4         | 92.0          | 79.8      | 3.0         | 15.6      |
|                             |                        |           | Ceftazidime                 | ≤0.25       | ≤0.25     | 0.5         | 2         | 94.0          | 86.2      | 0           | 0.9       |
|                             |                        |           | Cefepime                    | ≤0.25       | ≤0.25     | 1           | 8         | 93.0          | 78.9      | 0           | 2.8       |
|                             |                        |           | Imipenem                    | ≤0.25       | 0.5       | 0.5         | 1         | 100           | 100       | 0           | 0         |
|                             |                        |           | Ertapenem                   | ≤0.25       | ≤0.25     | ≤0.25       | ≤0.25     | 100           | 100       | 0           | 0         |
|                             |                        |           | Ciprofloxacin               | ≤0.063      | ≤0.063    | 0.125       | 4         | 93.0          | 82.6      | 6.0         | 13.8      |
|                             |                        |           | Moxifloxacin                | 0.125       | 0.125     | 0.25        | 4         | 92.0          | 79.8      | 7.0         | 16.5      |
|                             |                        |           | Gentamicin                  | 0.5         | 1         | 1           | 2         | 99.0          | 94.5      | 1.0         | 4.6       |
|                             |                        |           | <i>K. pneumoniae</i>        | 186         | 185       | Tigecycline | 0.5       | 0.5           | 4         | 2           | 82.3      |
| Doxycycline                 | 1                      | 2         |                             |             |           | 16          | 16        | 55.9          | 40.0      | 26.9        | 26.5      |
| Amoxicillin-clavulanic acid | 2                      | 4         |                             |             |           | 16          | 32        | 58.1          | 49.2      | 13.4        | 19.5      |
| Piperacillin-tazobactam     | 2                      | 2         |                             |             |           | 8           | 32        | 91.4          | 84.3      | 8.1         | 10.3      |
| Cefotaxime                  | ≤0.25                  | ≤0.25     |                             |             |           | 0.5         | 16        | 93.0          | 85.9      | 5.4         | 13.5      |
| Ceftazidime                 | ≤0.25                  | ≤0.25     |                             |             |           | 1           | 16        | 92.5          | 84.9      | 4.3         | 10.3      |
| Cefepime                    | ≤0.25                  | ≤0.25     |                             |             |           | 1           | 4         | 91.4          | 84.3      | 4.8         | 7.6       |
| Imipenem                    | ≤0.25                  | 0.5       |                             |             |           | 0.5         | 1         | 98.9          | 100       | 0           | 0         |
| Ertapenem                   | ≤0.25                  | ≤0.25     |                             |             |           | ≤0.25       | ≤0.25     | 97.8          | 97.8      | 1.1         | 0.5       |
| Ciprofloxacin               | ≤0.063                 | ≤0.063    |                             |             |           | 0.5         | ≥16       | 90.3          | 82.2      | 8.1         | 16.8      |
| Moxifloxacin                | 0.125                  | 0.125     |                             |             |           | 1           | 8         | 87.1          | 74.1      | 7.0         | 20.0      |
| Gentamicin                  | 0.5                    | 0.5       |                             |             |           | 1           | 1         | 96.8          | 94.6      | 3.2         | 5.4       |
| <i>S. marcescens</i>        | 118                    | 124       |                             |             |           | Tigecycline | 1         | 1             | 2         | 2           | 80.5      |
|                             |                        |           | Doxycycline                 | 4           | 4         | 16          | 16        | 0.8           | 0         | 41.5        | 42.7      |
|                             |                        |           | Amoxicillin-clavulanic acid | ≥64         | ≥64       | ≥64         | ≥64       | 1.7           | 0.8       | 92.4        | 98.4      |
|                             |                        |           | Piperacillin-tazobactam     | 1           | 2         | 4           | 32        | 95.8          | 87.1      | 2.5         | 9.7       |
|                             |                        |           | Cefotaxime                  | ≤0.25       | 0.5       | 2           | 16        | 89.0          | 79.0      | 6.8         | 17.7      |
|                             |                        |           | Ceftazidime                 | ≤0.25       | ≤0.25     | 1           | 1         | 91.5          | 91.1      | 1.7         | 1.6       |
|                             |                        |           | Cefepime                    | ≤0.25       | ≤0.25     | 0.5         | 1         | 94.1          | 95.2      | 2.5         | 0         |
|                             |                        |           | Imipenem                    | 0.5         | 1         | 1           | 1         | 100           | 100       | 0           | 0         |
|                             |                        |           | Ertapenem                   | ≤0.25       | ≤0.25     | 0.5         | 0.5       | 93.2          | 91.9      | 4.2         | 2.4       |
|                             |                        |           | Ciprofloxacin               | ≤0.063      | ≤0.063    | 0.5         | 2         | 92.4          | 83.1      | 5.9         | 12.9      |
|                             |                        |           | Moxifloxacin                | 0.25        | 0.25      | 1           | 4         | 86.4          | 74.2      | 8.5         | 17.7      |
|                             |                        |           | Gentamicin                  | 0.5         | 1         | 1           | 2         | 94.9          | 95.2      | 2.5         | 2.4       |
|                             |                        |           | <i>S. maltophilia</i>       | 157         | 129       | Tigecycline | 0.5       | 0.5           | 2         | 1           | n.d.      |
| Doxycycline                 | 2                      | 2         |                             |             |           | 4           | 4         | n.d.          | n.d.      | n.d.        | n.d.      |
| Amoxicillin-clavulanic acid | ≥64                    | ≥64       |                             |             |           | ≥64         | ≥64       | n.d.          | n.d.      | n.d.        | n.d.      |
| Piperacillin-tazobactam     | ≥128                   | ≥128      |                             |             |           | ≥128        | ≥128      | n.d.          | n.d.      | n.d.        | n.d.      |
| Cefotaxime                  | ≥64                    | ≥64       |                             |             |           | ≥64         | ≥64       | n.d.          | n.d.      | n.d.        | n.d.      |
| Ceftazidime                 | ≥64                    | ≥64       |                             |             |           | ≥64         | ≥64       | n.d.          | n.d.      | n.d.        | n.d.      |
| Cefepime                    | ≥64                    | ≥64       |                             |             |           | ≥64         | ≥64       | n.d.          | n.d.      | n.d.        | n.d.      |
| Imipenem                    | ≥64                    | ≥64       |                             |             |           | ≥64         | ≥64       | n.d.          | n.d.      | n.d.        | n.d.      |
| Ertapenem                   | ≥64                    | ≥64       |                             |             |           | ≥64         | ≥64       | n.d.          | n.d.      | n.d.        | n.d.      |
| Ciprofloxacin               | 2                      | 2         |                             |             |           | ≥16         | 8         | n.d.          | n.d.      | n.d.        | n.d.      |
| Moxifloxacin                | 0.5                    | 0.5       |                             |             |           | 2           | 2         | n.d.          | n.d.      | n.d.        | n.d.      |
| Gentamicin                  | ≥32                    | ≥32       |                             |             |           | ≥32         | ≥32       | n.d.          | n.d.      | n.d.        | n.d.      |

n.d.=not determined as no species-related breakpoint has been approved by the EUCAST

<sup>a</sup>The percentage could not be determined as the breakpoint is below the lowest concentration tested.
